# Supplementary material
Source: publisher site journal article supplement (https://www.spandidos-publications.com/1351/downloadSupplementary)

Figure S1. Cell cycle analysis of AsPC-1 and BxPC-3 cell lines treated or not with 10 nM CTX. CTX, cabazitaxel; NC, negative control.

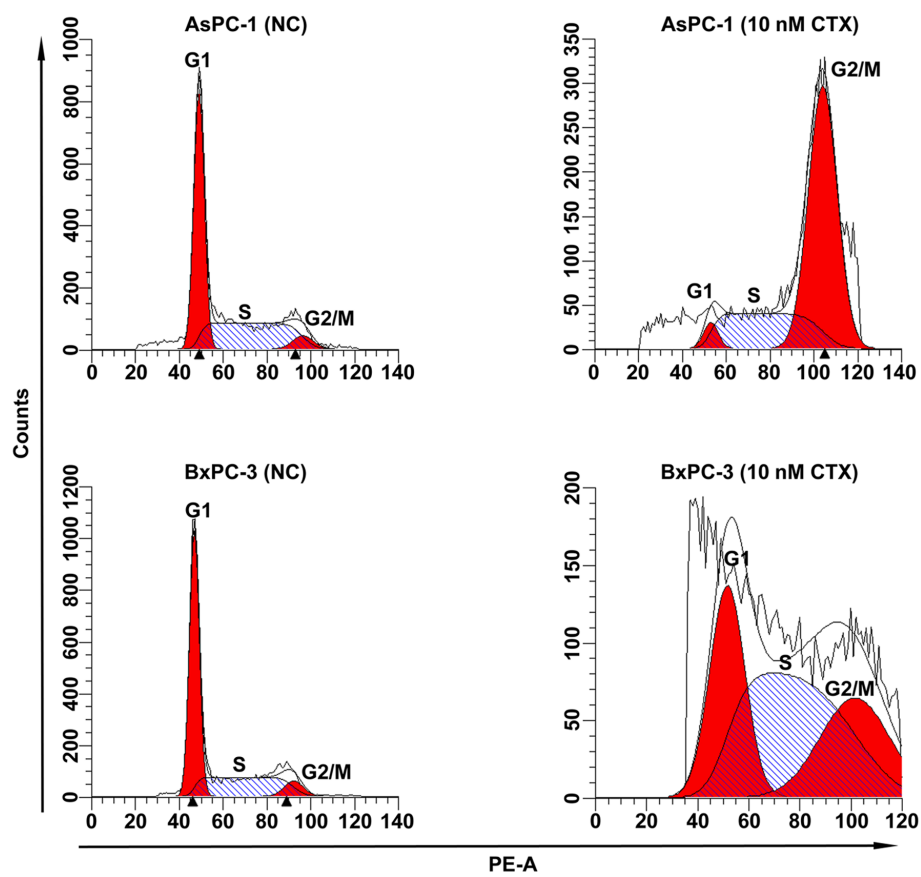

Figure S2. (A) Absorbance detected at 450 nM after 0, 24 and 48 h 5  $\mu$ M CAPE treating compared with control group using Cell Counting Kit-8 assay in PC cell lines. (B) Cell cycle quantitative data of NC group, CAPE group, CTX group and CTX+CAPE group. (C) Protein expression of p53 and Bcl-2 after p53 overexpression assessed by western blotting. CAPE, caffeic acid phenethyl ester; CTX, cabazitaxel; NC, negative control; PC, prostate cancer; PTX, paclitaxel.

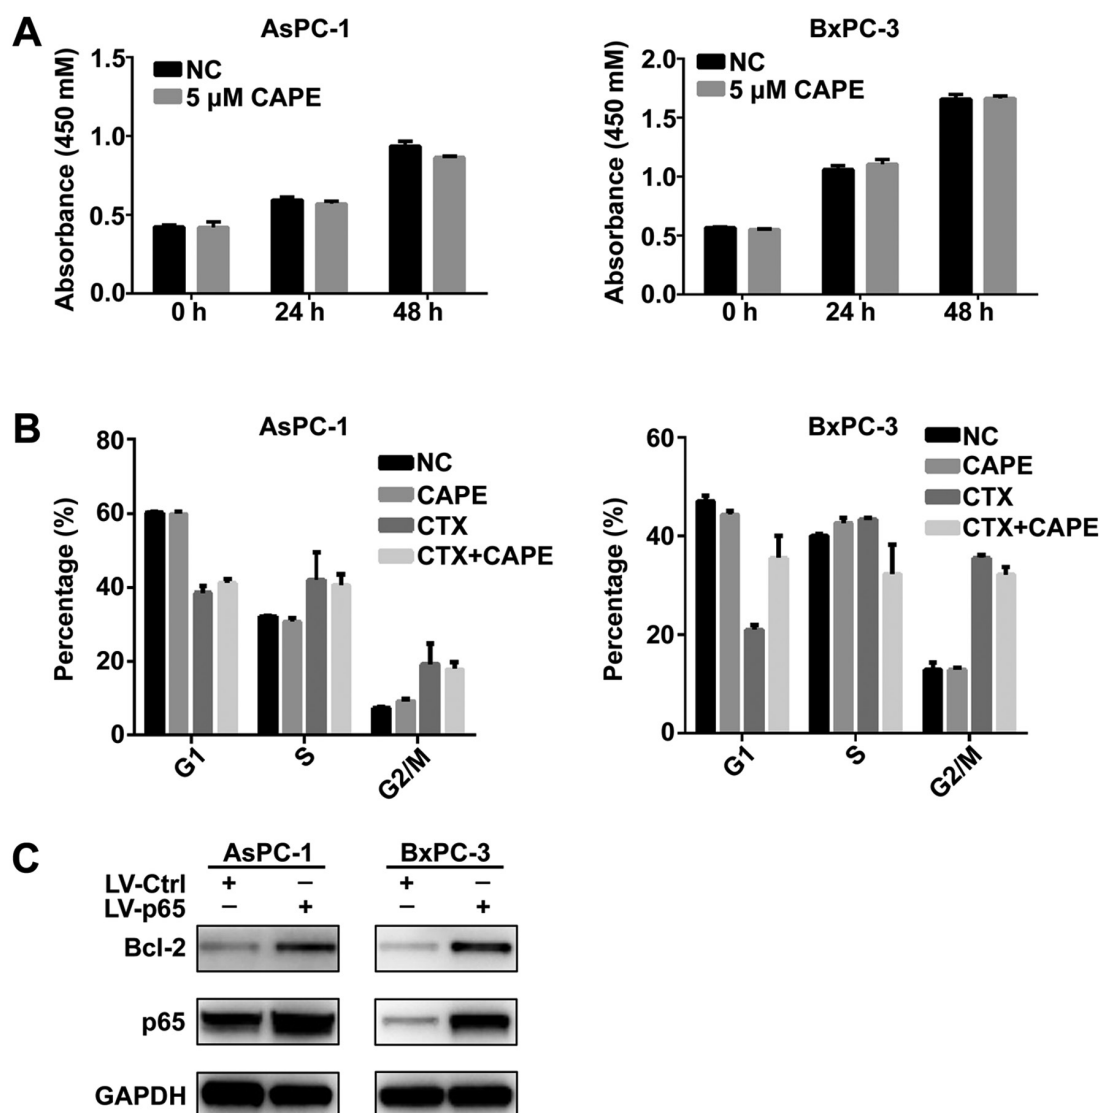

Supplement: Supplementary file 1 [file downloadSupplementary]
